# Supplementary material
Source: Springer Nature journal article supplement (https://www.springermedizin.de/resource/supplementary/12943_2007_363_MOESM3_ESM.pdf/9554018)

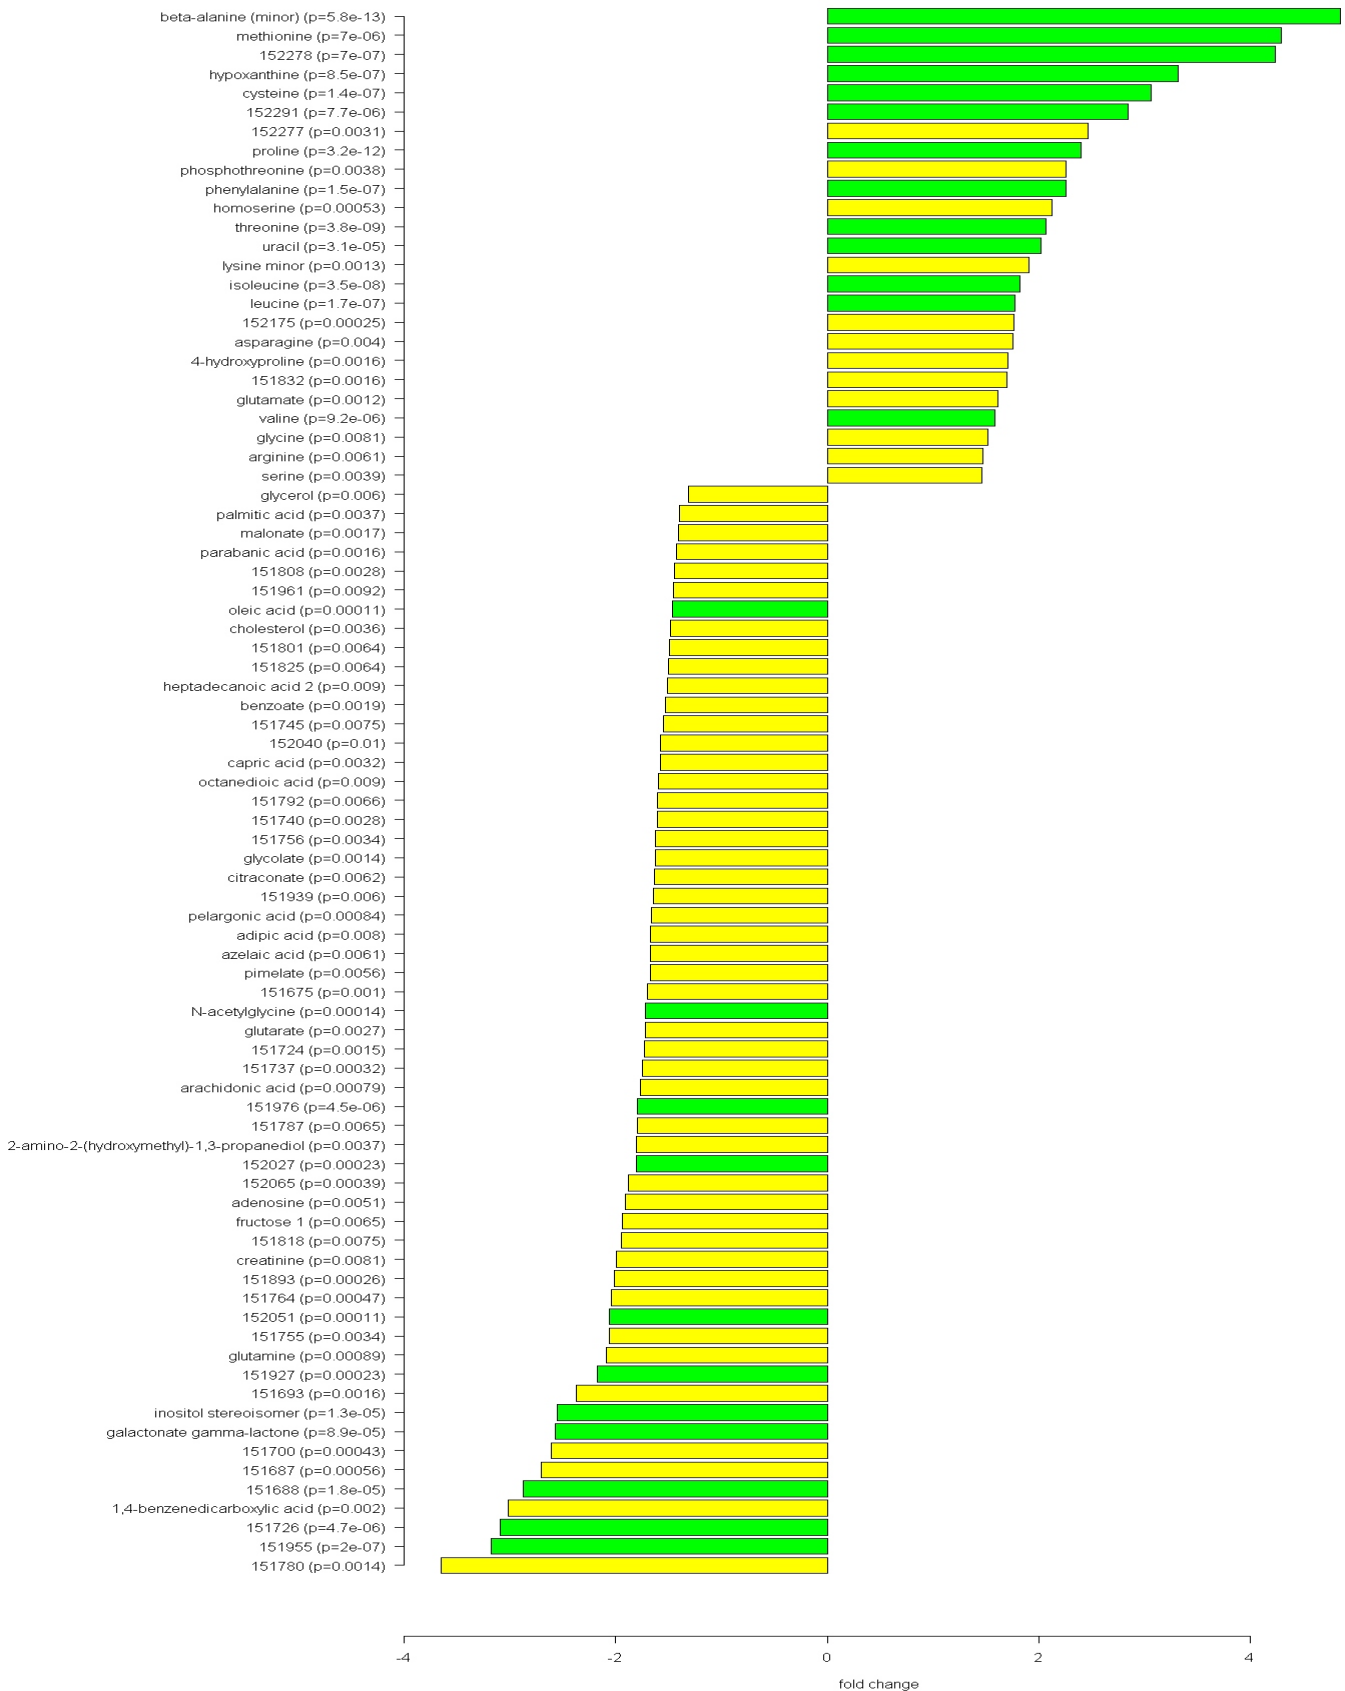

increased in normal tissue | increased in colon cancer

Supplement: MOESM3 [file 9554018]
